# Supplementary material for: Antioxidant and antibacterial starch-based edible films composed of eugenol/gelatin microspheres
Source: Royal Society of Chemistry journal article supplement (doi:10.1039/d2nj04457a), 2023-01-01
Supplement: d2nj04457a1.pdf [file d2nj04457a1.pdf]

## Supporting Information

### Antioxidant and antibacterial starch edible films composed of eugenol/gelatin microspheres

Ying Chen<sup>1#</sup>, Feng Wei<sup>1#</sup>, Wei Mu<sup>1\*</sup>, Xiaojun Han<sup>1\*</sup>

<sup>1</sup>State Key Laboratory of Urban Water Resource and Environment, School of Chemistry and Chemical Engineering, Harbin Institute of Technology, 92 West Da-Zhi Street, Harbin, 150001, China

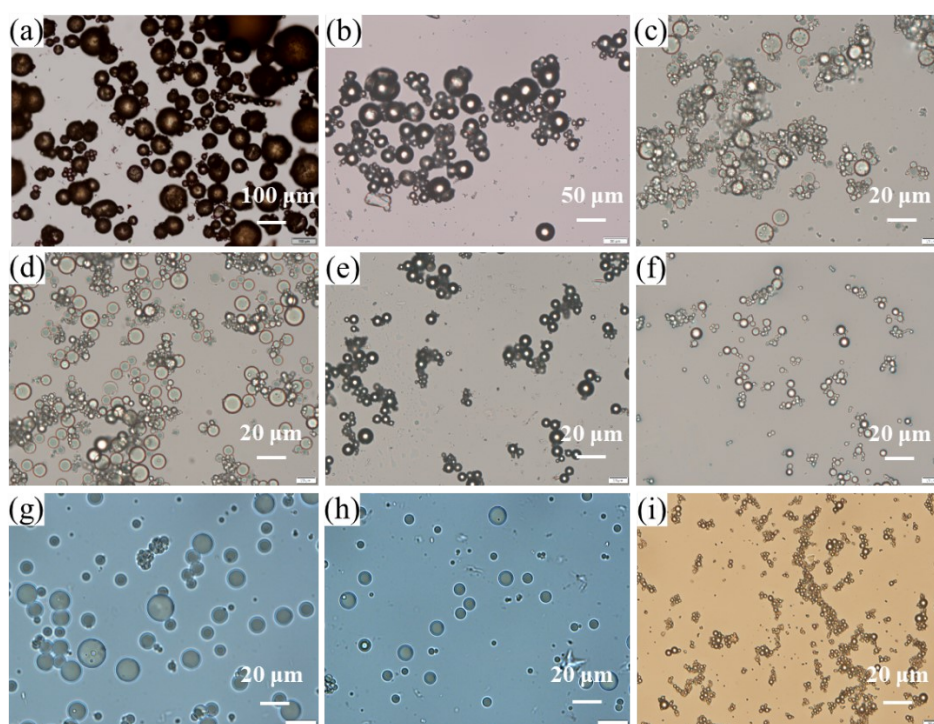

Fig. S1. Gelatin microspheres synthesized under conditions of (a) gelatin concentration of 20%, Span-80 amount of 2%, water to oil ratio of 1:5, glutaraldehyde amount of 2%; (b) gelatin concentration of 15%, Span-80 amount of 2%, water to oil ratio of 1:5, glutaraldehyde amount of 2%; (c) gelatin concentration of 10%, Span-80 amount of 4%, water to oil ratio of 1:5, glutaraldehyde amount of 2%; (d) gelatin concentration of 10%, Span-80 amount of 6%, water to oil ratio of 1:5, glutaraldehyde amount of 2%; (e) gelatin concentration of 10%, Span-80 amount of 2%, water to oil ratio of 1:10, glutaraldehyde amount of 2%; (f) gelatin concentration of 10%, Span-80 amount of 2%, water to oil ratio of 1:15, glutaraldehyde amount of 2%; (g) gelatin concentration of 10%, Span-80 amount of 2%, water to oil ratio of 1:5, glutaraldehyde amount of 6%; (h) gelatin concentration of 10%, Span-80 amount of 2%, water to oil ratio of 1:5, glutaraldehyde amount of 4%; (i) gelatin concentration of 10%, Span-80 amount of 2%, water to oil ratio of 1:5, glutaraldehyde amount of 2%.

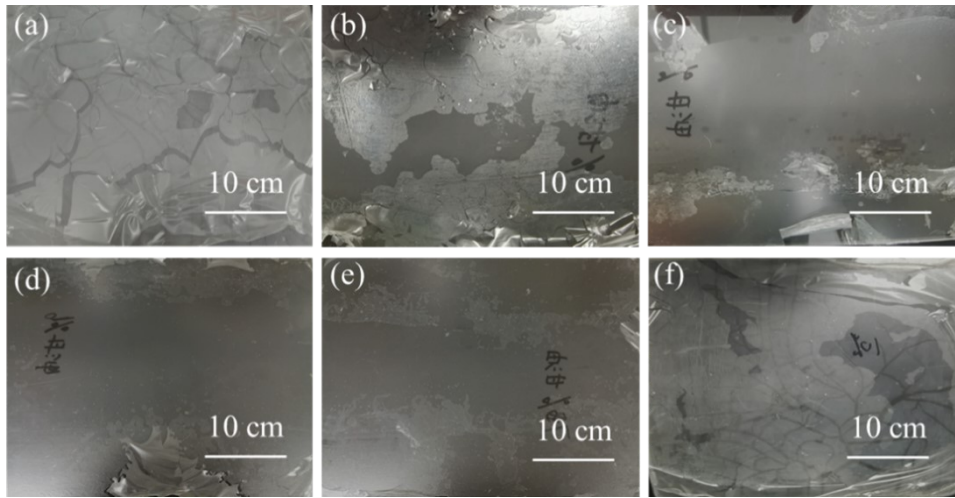

Fig. S2. Digital pictures of starch film (corn starch to cassava starch=1:0) with (a) 0% glycerol, (b) 1% glycerol, (c) 3% glycerol, (d) 5% glycerol, (e) 7% glycerol, and (f) 10% glycerol.

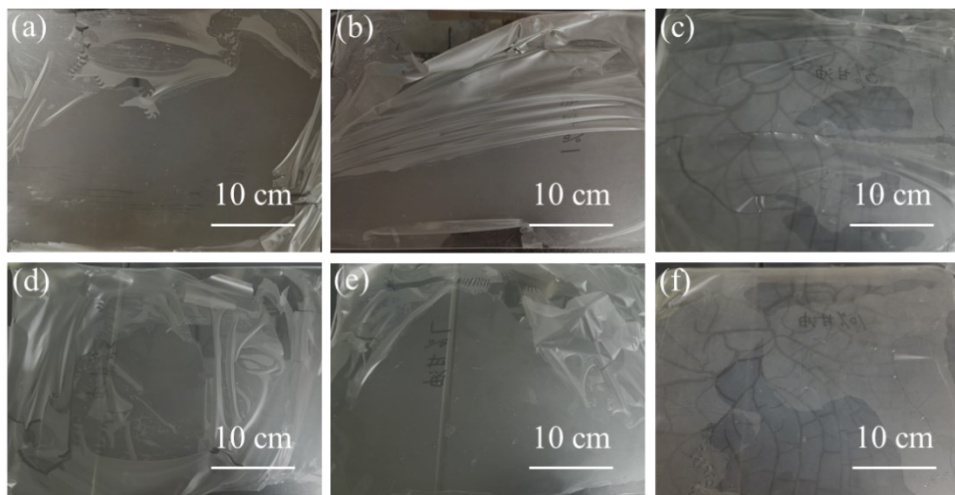

Fig. S3. Digital pictures of starch film (corn starch: cassava starch=1:1) with (a) 0% glycerol, (b) 1% glycerol, (c) 3% glycerol, (d) 5% glycerol, (e) 7% glycerol, and (f) 10% glycerol.

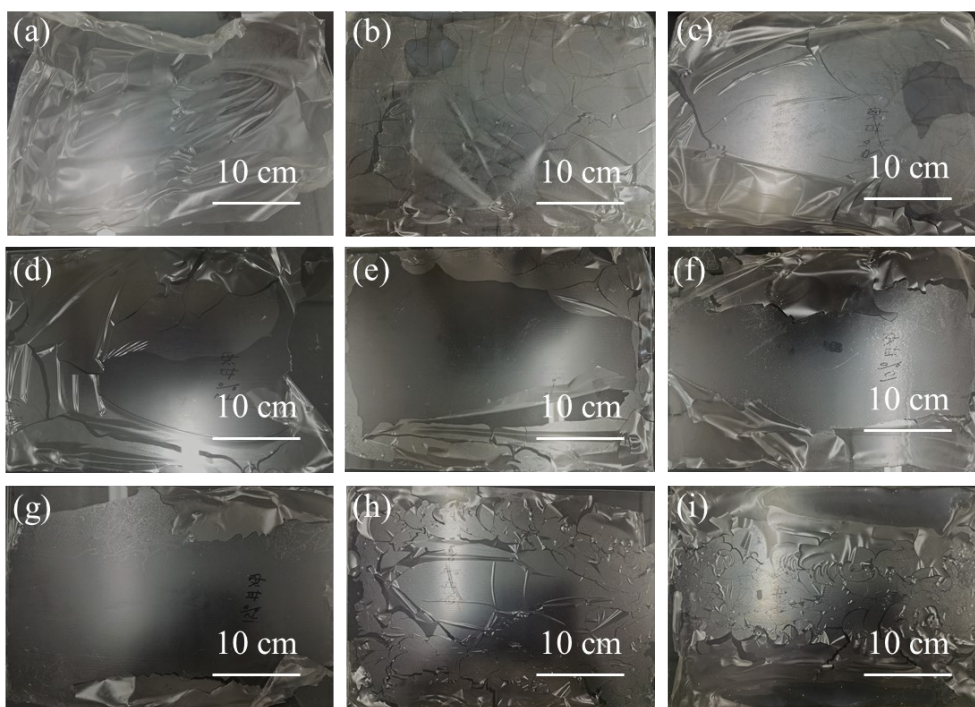

Fig. S4. Digital pictures of starch film (corn starch: cassava starch=1:2) with (a) 0% glycerol, (b) 1% glycerol, (c) 3% glycerol, (d) 5% glycerol, (e) 7% glycerol, (f) 10% glycerol, (g) 15% glycerol, (h) 20% glycerol, and (i) 30% glycerol.

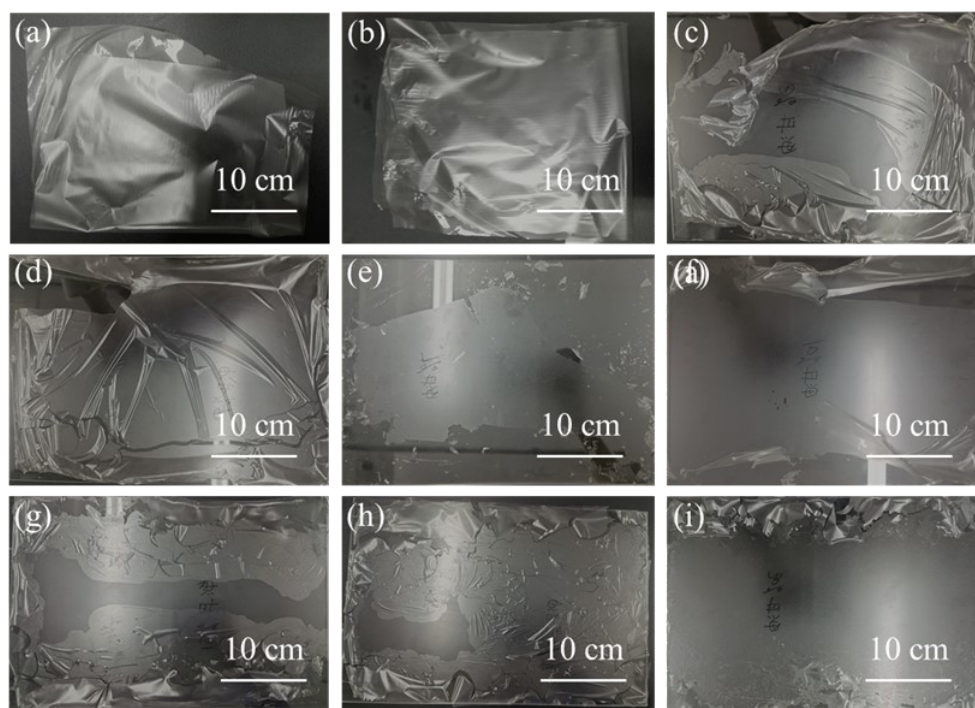

Fig. S5. Digital pictures of starch film (corn starch: cassava starch=1:4) with (a) 0% glycerol, (b) 1% glycerol, (c) 3% glycerol, (d) 5% glycerol, (e) 7% glycerol and (f) 10% glycerol, (g) 15% glycerol, (h) 20% glycerol, and (i) 30% glycerol.



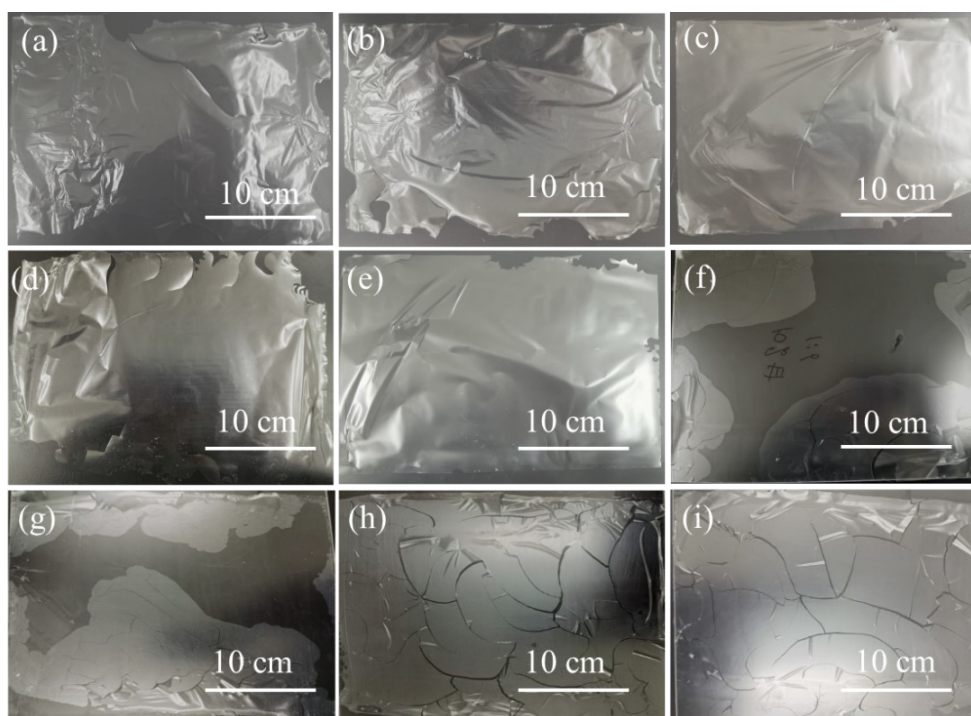

Fig. S6. Digital pictures of starch film (corn starch: cassava starch=1:6) with (a) 0% glycerol, (b) 1% glycerol, (c) 3% glycerol, (d) 5% glycerol, (e) 7% glycerol and (f) 10% glycerol, (g) 15% glycerol, (h) 20% glycerol, and (i) 30% glycerol.

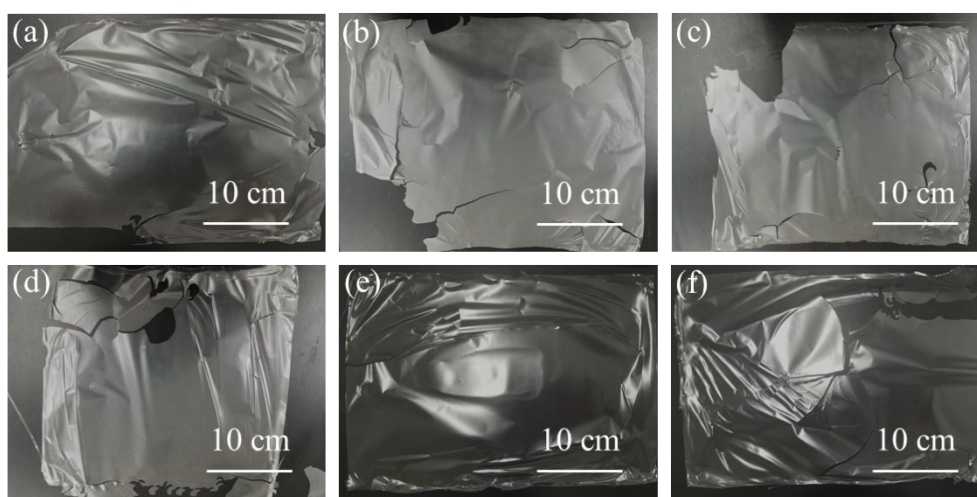

Fig. S7. Digital pictures of starch film (corn starch: cassava starch=0:1) with (a) 0% glycerol, (b) 1% glycerol, (c) 3% glycerol, (d) 5% glycerol, (e) 7% glycerol and (f) 10% glycerol.

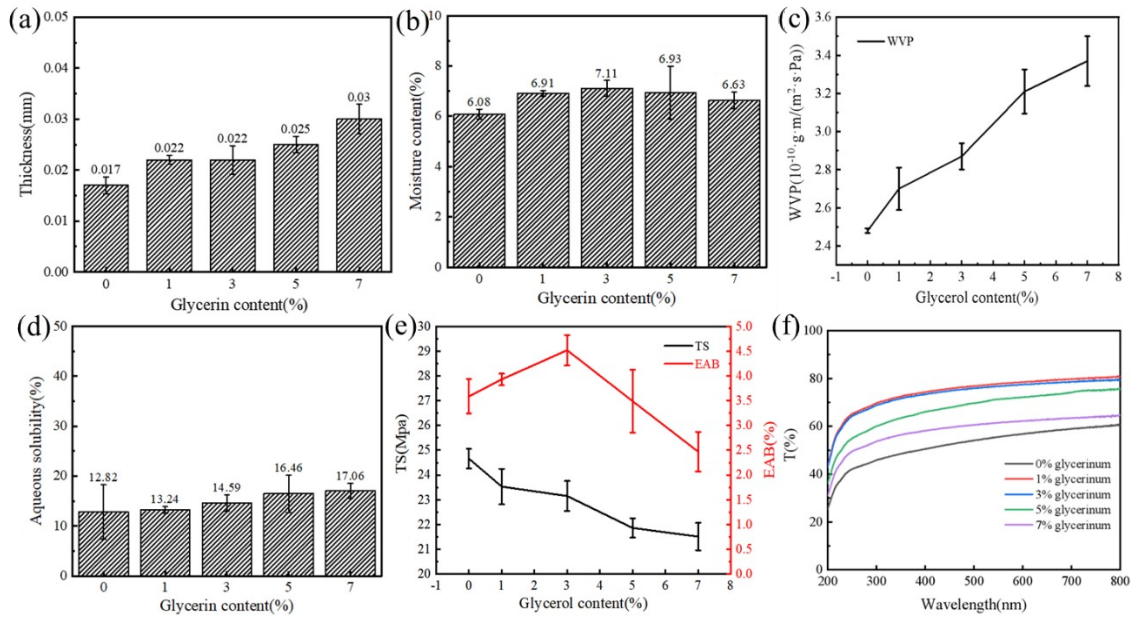

Fig. S8. (a) Thickness, (b) moisture content, (c) water vapor permeability, (d) water solubility, (e) tensile strength and elongation at break, and (f) light transmittance of different samples.

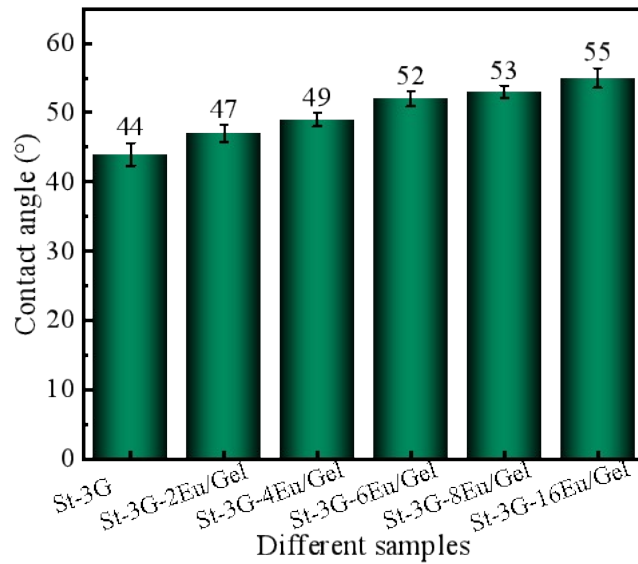

Fig. S9. Contact angle with different samples.

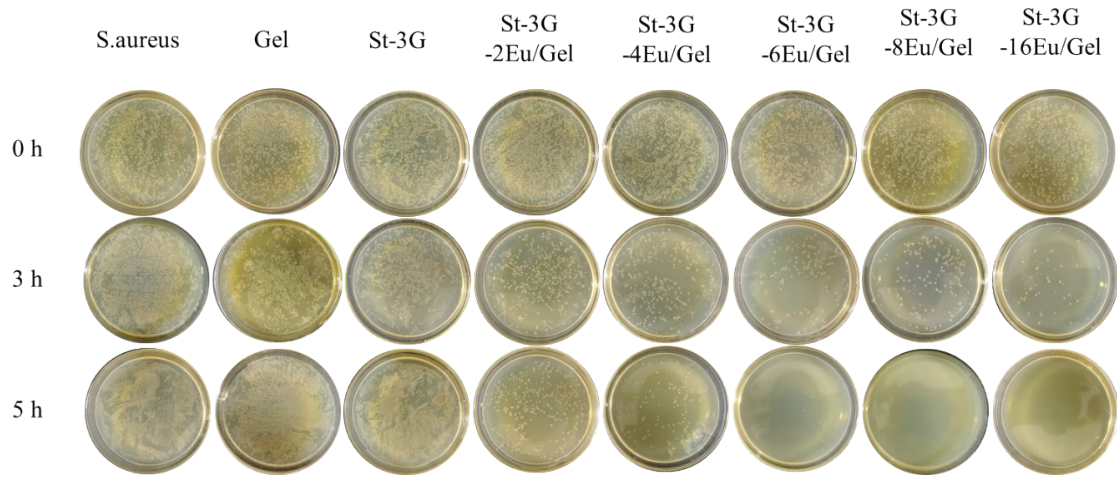

Fig. S10. Digital photos of viable *S. aureus* colonies after incubating with different samples.

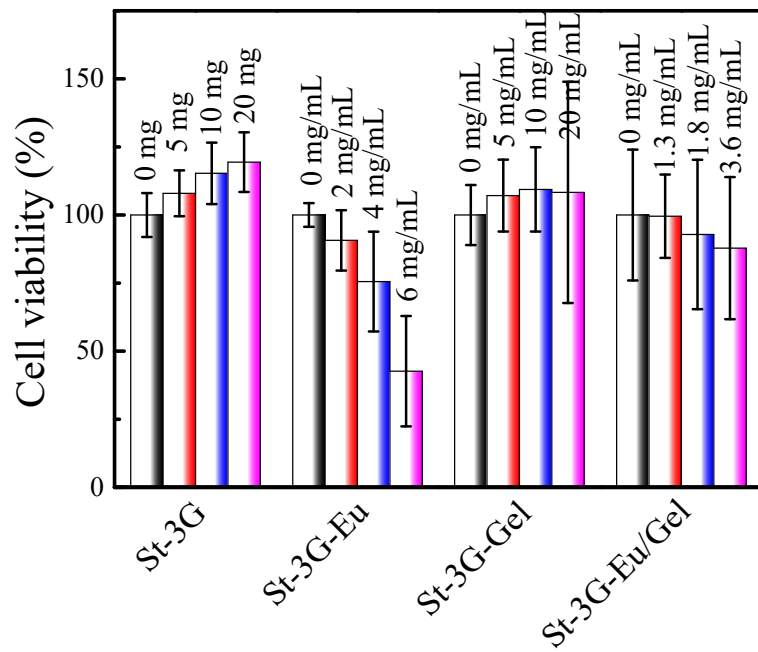

Fig. S11. Cell viability in different samples.
